# Supplementary material for: Canonical versus non-canonical transsynaptic signaling of neuroligin 3 tunes development of sociality in mice
Source: PubMed Central journal article supplement (PMC7988105; doi:10.1038/s41467-021-22059-6), 2021-03-23
Supplement: 41467_2021_22059_MOESM1_ESM.pdf [file 41467_2021_22059_MOESM1_ESM.pdf]

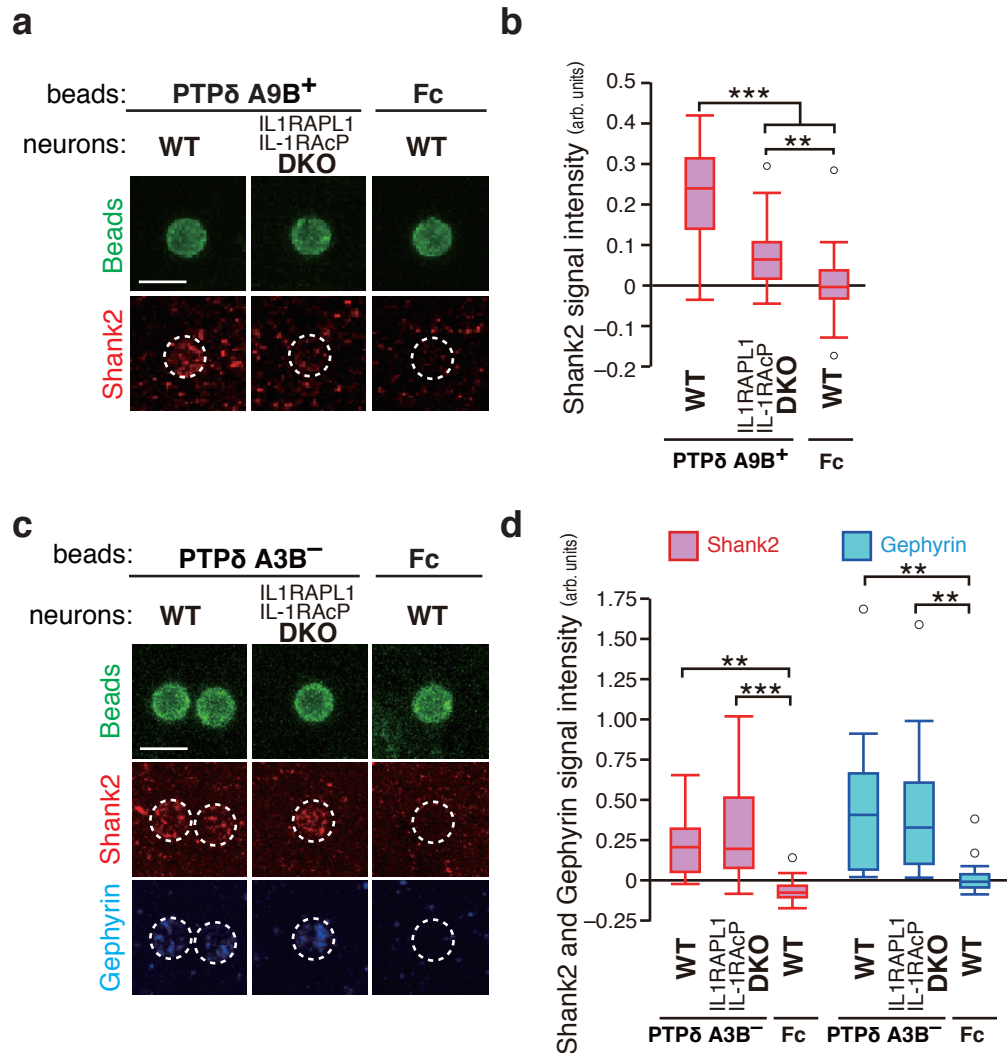

### Supplementary Fig. 1: Effects of IL1RAPL1 and IL-1RAcP double knockout on postsynaptic differentiation induced by PTP $\delta$ splice variants.

**a**, Induction of excitatory postsynaptic differentiation of cerebral cortical neurons from wild-type and IL1RAPL1/IL-1RAcP double knockout (DKO) mice by magnetic beads coated with the ECD of meB-containing PTP $\delta$  variant (PTP $\delta$ A9B<sup>+</sup>) was visualized by immunostaining for Shank2 (red).

**b**, Intensity of staining signals for Shank2 in **a** ( $n = 36$  and  $48$  PTP $\delta$ A9B<sup>+</sup> beads for WT and DKO, respectively;  $n = 45$  Fc beads).

**c**, Induction of excitatory and inhibitory postsynaptic differentiation of cerebral cortical neurons from wild-type and IL1RAPL1/IL-1RAcP DKO mice by beads conjugated with the ECD of meB-lacking PTP $\delta$  variant (PTP $\delta$ A3B<sup>-</sup>) was visualized by immunostaining for Shank2 (red) and gephyrin (blue).

**d**, Intensity of staining signals for Shank2 (red bars) and gephyrin (blue bars) in **c** ( $n = 18$  PTP $\delta$ A3B<sup>-</sup> beads each for WT and DKO;  $n = 16$  Fc beads). Scale bars represent  $5 \mu\text{m}$ . Data are presented as box plots. Horizontal line in each box shows median, box shows the IQR and the whiskers are  $1.5 \times \text{IQR}$ . \*\* $P < 0.01$  and \*\*\* $p < 0.001$ , Tukey's post hoc test. See Supplementary Table 4 for additional statistics and exact  $p$  values.

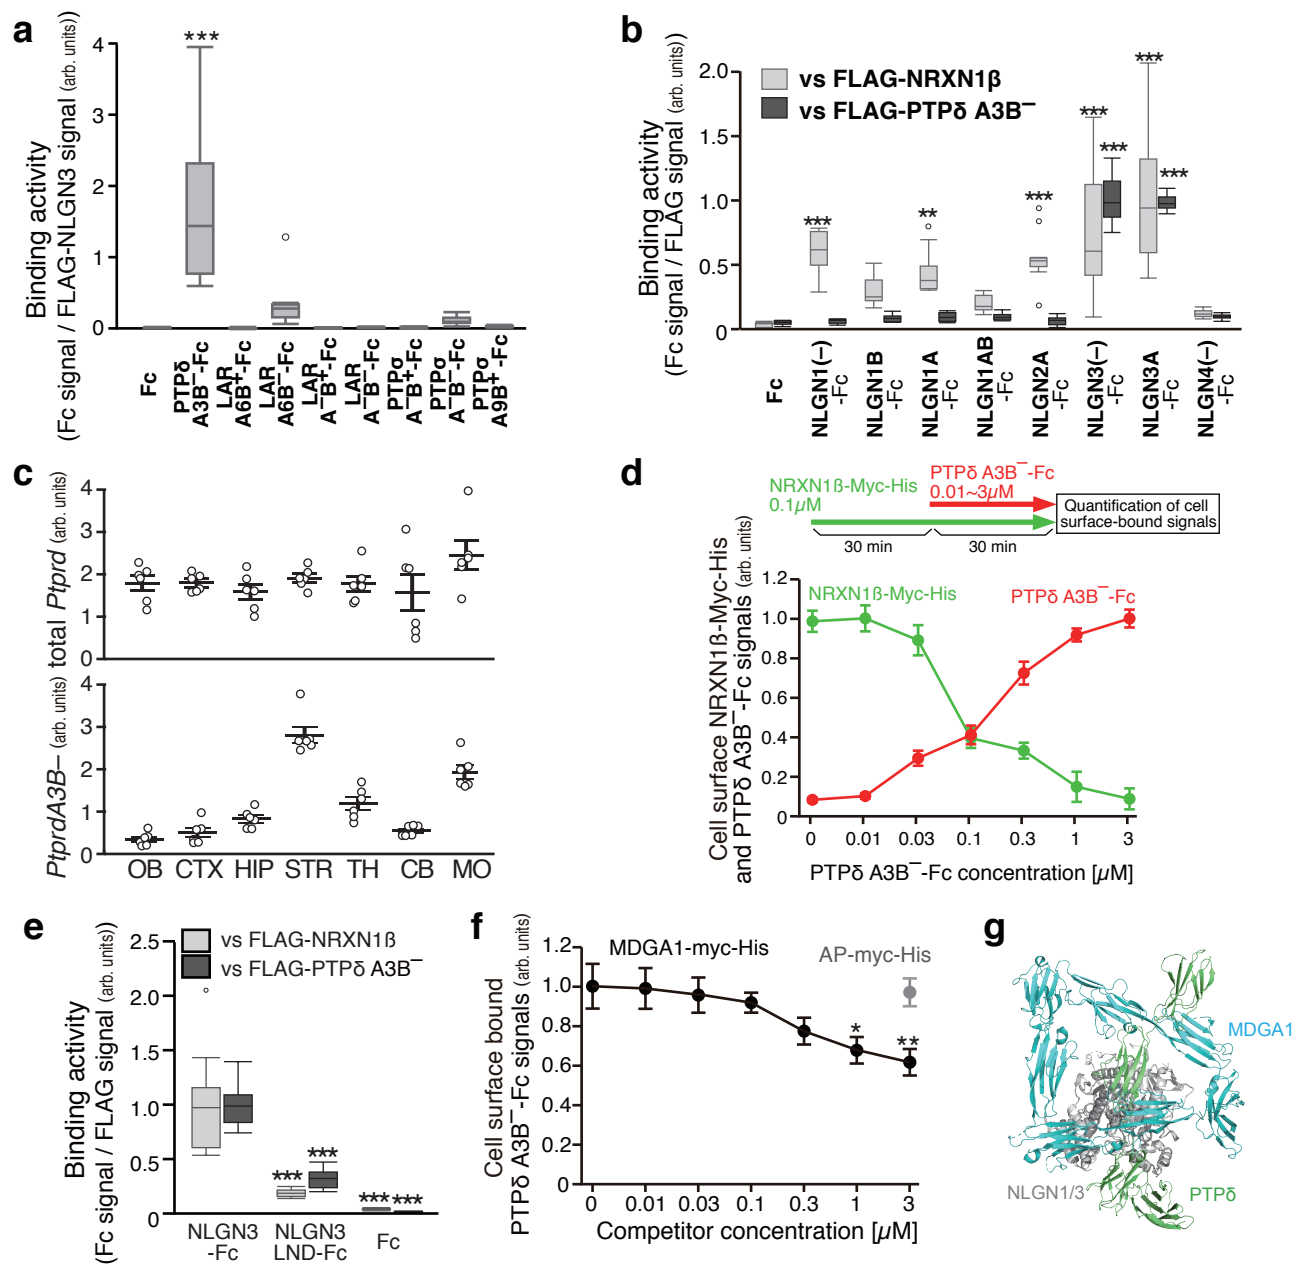

## Supplementary Fig. 2: Selective interaction between NLGN3 and PTPδ splice variants lacking meB.

**a**, Ratios of cell surface staining signals for ECDs of LAR and PTPσ splice variants fused to Fc and FLAG-NLGN3 expressed on HEK293T cells (n = 15 cells each). **b**, Ratios of cell surface staining signals for Fc fusion proteins of ECDs of the NLGN family and FLAG-NRXN1β (gray bars) or FLAG-PTPδA3B<sup>-</sup> (black bars) expressed on HEK293T cells (n = 12 cells each). **c**, Brain regional variation of total *Ptpprd* and *PtprdA3B<sup>-</sup>* variant expression. Total *Ptpprd* (top) and *PtprdA3B<sup>-</sup>* variant (bottom) expression levels estimated by real-time PCR are shown (n = 6 each, triplicate experiments for 2 mice). OB, olfactory bulb; CTX, cerebral cortex; HIP, hippocampus; STR, striatum; TH, thalamus; CB, cerebellum; MO, medulla oblongata. **d**, After NLGN3-NRXN1β complexes were formed on HEK293T cells expressing FLAG-NLGN3, PTPδA3B<sup>-</sup>-Fc was added at the concentrations of 0–3.0 μM. Cell surface bound signals for NRXN1β-Myc-His and PTPδA3B<sup>-</sup>-Fc were quantified (n = 20 cells each). **e**, Ratios of cell surface staining signals for ECDs of wild-type or L374A/N375A/D377A mutated form (LND) of NLGN3 fused to Fc and FLAG-NRXN1β or FLAG-PTPδA3B<sup>-</sup> expressed on HEK293T cells (n = 10 cells each). **f**, Cell surface bound PTPδA3B<sup>-</sup>-Fc signals on FLAG-NLGN3-expressing HEK293T cells in the presence of 0–3.0 μM MDGA1-Myc-His were quantified (n = 20 cells each). **g**, Superposition of the MDGA1-bound NLGN1 (PDB 5OJR) onto the PTPδA3B<sup>-</sup>-bound NLGN3. The interface between PTPδA3B<sup>-</sup> and NLGN3 is overlapped with that between MDGA1 and NLGN1. Data in **a**, **b**, and **e** are presented as box plots. Horizontal line in each box shows median, box shows the IQR and the whiskers are 1.5 × IQR. Values in **d** and **f** represent mean ± s.e.m. \*P < 0.05, \*\*P < 0.01 and \*\*\*P < 0.001, Two-sided Dunnett' s test in **a**, **b** and **f**, and Tukey' s post hoc test in **e**. See Supplementary Table 4 for additional statistics and exact p values.

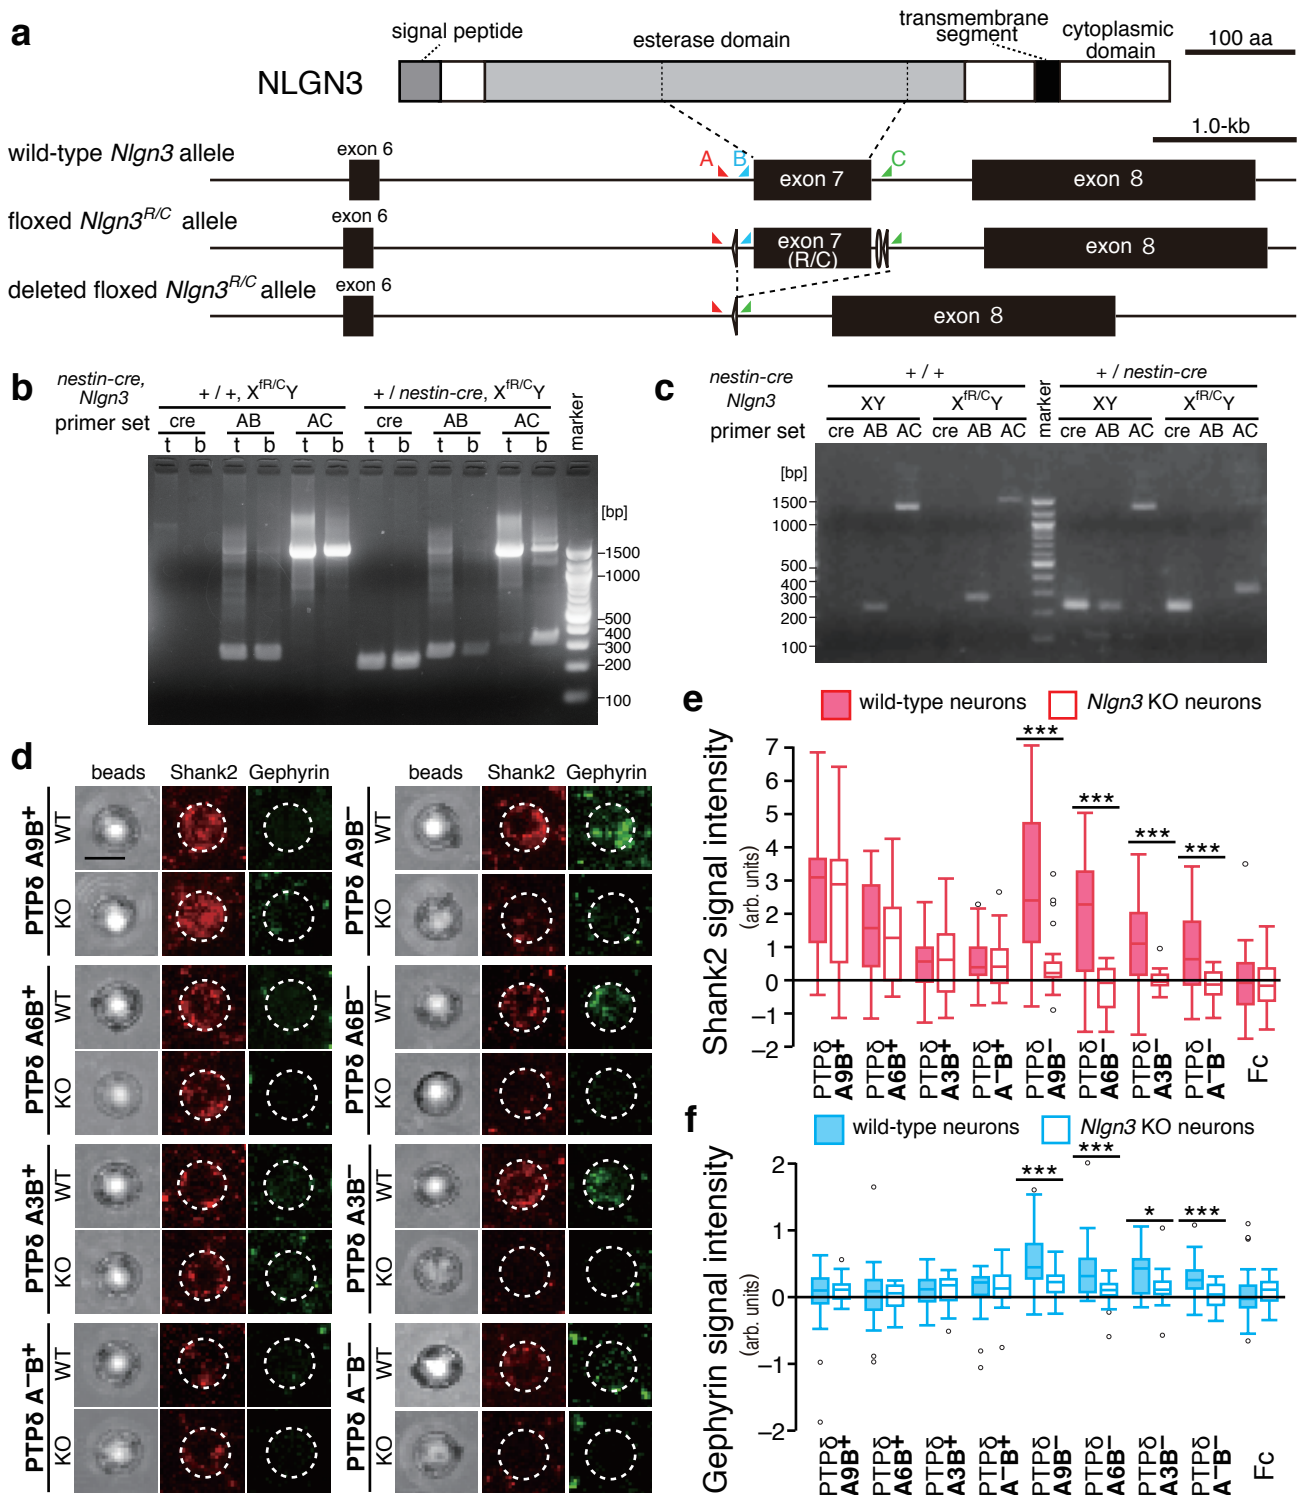

**Supplementary Fig. 3: PTP $\delta$  splice variants lacking meB require NLGN3 for postsynaptic differentiation.** **a**, Schema for generation of neuron-specific *Nlgn3* exon 7-deleted mice. *Nlgn3* exon 7-deleted mice were generated by crossing heterozygous female XX<sup>fR/C</sup> mice, which carry floxed exon 7 with a point mutation corresponding to the human NLGN3 R451C, with nestin-Cre transgenic male mice (+/nestin-cre) carrying the cre recombinase gene under the control of the rat nestin promoter and enhancer. **b**, Detection of undeleted and deleted floxed *Nlgn3* alleles by PCR using primers A, B, and C against genomic DNA from tails (t) and brains (b) of adult male X<sup>fR/C</sup>Y mice with or without the nestin-Cre transgene. **c**, PCR detection of *Nlgn3* exon 7 deletion in DIV8 cortical neurons prepared from X<sup>fR/C</sup>Y, +/nestin-cre mice using primers A, B, and C. **d**, Induction of postsynaptic differentiation of wild-type and NLGN3 knockout cerebral cortical neurons by magnetic beads coated with ECDs of PTP $\delta$  splice variants fused to Fc. Excitatory and inhibitory postsynaptic terminals induced by the beads were visualized by immunostaining for Shank2 (red) and gephyrin (green), respectively. **e** and **f**, Intensity of staining signals for Shank2 (**e**) and gephyrin (**f**) on the beads was quantified (n = 24 and 29 PTP $\delta$ A9B<sup>+</sup>-beads, 27 and 26 PTP $\delta$ A6B<sup>+</sup>-beads, 33 and 28 PTP $\delta$ A3B<sup>+</sup>-beads, 27 and 26 PTP $\delta$ A-B<sup>+</sup>-beads, 30 and 31 PTP $\delta$ A9B<sup>-</sup>-beads, 24 and 30 PTP $\delta$ A6B<sup>-</sup>-beads, 24 and 28 PTP $\delta$ A3B<sup>-</sup>-beads, 34 and 31 PTP $\delta$ A-B<sup>-</sup>-beads, and 28 and 32 Fc-beads, for wild-type and *Nlgn3* KO neurons, respectively). Data are presented as box plots. Horizontal line in each box shows median, box shows the IQR and the whiskers are 1.5  $\times$  IQR. \*p < 0.05 and \*\*\*p < 0.001, Two-sided Student's t-test. Scale bar represents 5  $\mu$ m. See Supplementary Table 4 for additional statistics and exact p values.

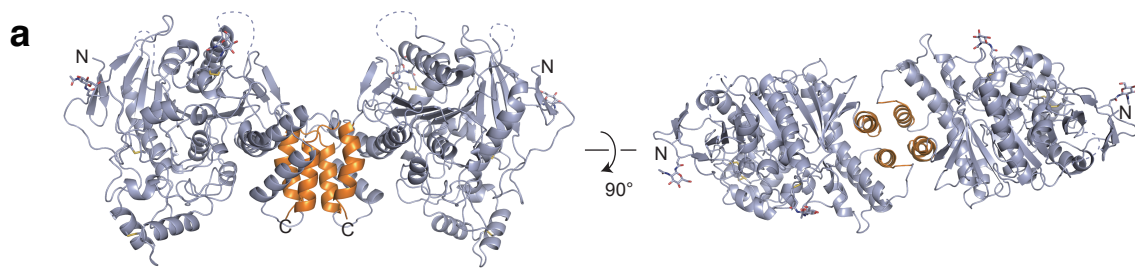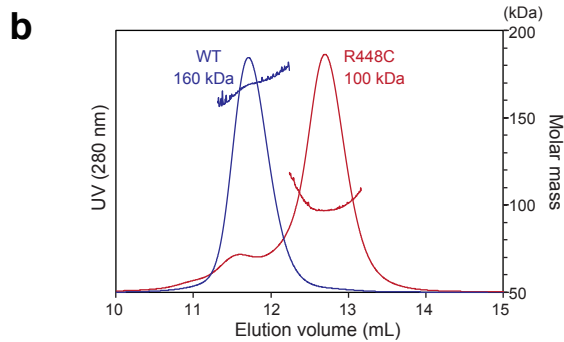

**c**

|          |     |                                                               |     |
|----------|-----|---------------------------------------------------------------|-----|
| mNLGN3   | 254 | GDPRRIIVFGSGIGASCVSLLLTSLHSHSEGLFQRAI-----IQSGSALSSWAVNYQP    | 304 |
| rNLGN3   | 277 | GDPRRIIVFGSGIGASCVSLLLTSLHSHSEGLFQRAI-----IQSGSALSSWAVNYQP    | 327 |
| hNLGN3   | 277 | GDPRRIIVFGSGIGASCVSLLLTSLHSHSEGLFQRAI-----IQSGSALSSWAVNYQP    | 327 |
| mNLGN1   | 270 | GDPLRITVFGSGAGGSCVNLILLSHSHSEGNRWSNSTKGLFQRAIAQSGTALSSWAVSFQP | 329 |
| rNLGN1   | 270 | GDPLRITVFGSGAGGSCVNLILLSHSHSEGNRWSNSTKGLFQRAIAQSGTALSSWAVSFQP | 329 |
| hNLGN1   | 267 | GDPLRITVFGSGAGGSCVNLILLSHSHSEGNRWSNSTKGLFQRAIAQSGTALSSWAVSFQP | 326 |
| mNLGN2   | 254 | GDPERITVFGSGAGASCVNLLILLSHSHSEGLFQKAI-----AQSGTAISSWSVNYQP    | 304 |
| rNLGN2   | 254 | GDPERITVFGSGAGASCVNLLILLSHSHSEGLFQKAI-----AQSGTAISSWSVNYQP    | 304 |
| hNLGN2   | 254 | GDPERITVFGSGAGASCVNLLILLSHSHSEGLFQKAI-----AQSGTAISSWSVNYQP    | 304 |
| mNLGN4   | 252 | GDPRVITVFGSGAGASCVSLLLTSLHSHSEGLFQKAI-----IQSGTALSSWAVNYQP    | 302 |
| hNLGN4-X | 243 | GDPKRVITVFGSGAGASCVSLLLTSLHSHSEGLFQKAI-----IQSGTALSSWAVNYQP   | 293 |
| hNLGN4-Y | 243 | GDPKRVITVFGSGAGASCVSLLLTSLHSHSEGLFQKAI-----IQSGTALSSWAVNYQP   | 293 |
|          |     |                                                               |     |
| mNLGN3   | 305 | VKYTSLLADKVGCN-----VLDTVMVDCLRQKSAKELVEQDIQPARYHVAFG          | 352 |
| rNLGN3   | 328 | VKYTSLLADKVGCN-----VLDTVMVDCLRQKSAKELVEQDIQPARYHVAFG          | 375 |
| hNLGN3   | 328 | VKYTSLLADKVGCN-----VLDTVMVDCLRQKSAKELVEQDIQPARYHVAFG          | 375 |
| mNLGN1   | 330 | AKYARILATKVGCN-----VSDTVELVECLQKKPKYKELVDQVQPARYHIAFG         | 377 |
| rNLGN1   | 330 | AKYARILATKVGCN-----VSDTVELVECLQKKPKYKELVDQVQPARYHIAFG         | 377 |
| hNLGN1   | 327 | AKYARMLATKVGCN-----VSDTVELVECLQKKPKYKELVDQDIQPARYHIAFG        | 374 |
| mNLGN2   | 305 | LKYTRLLAAKVGCD-----REDSTEAVECLRRKSSRELVDQVQPARYHIAFG          | 352 |
| rNLGN2   | 305 | LKYTRLLAAKVGCD-----REDSTEAVECLRRKSSRELVDQVQPARYHIAFG          | 352 |
| hNLGN2   | 305 | LKYTRLLAAKVGCD-----REDSAEAVECLRRKPSRELVDQVQPARYHIAFG          | 352 |
| mNLGN4   | 303 | ARYARALGERVGCATPDPGSPGSPGWDASALVSCLRGKAAGELARARVTPATYHVAFG    | 362 |
| hNLGN4-X | 294 | AKYTRILADKVGCN-----MLDTTDMVECLRNKNYKELIQQTITPATYHIAFG         | 341 |
| hNLGN4-Y | 294 | AKYTRILADKVGCN-----MLDTTDMVECLRNKNYKELIQQTITPATYHIAFG         | 341 |
|          |     |                                                               |     |
| mNLGN3   | 353 | PVIDGDVIPPDDPEILMQQGEFLNYDIMLGVNQGEGLKFVEG-VVDPEDGVSQDFDYSVS  | 411 |
| rNLGN3   | 376 | PVIDGDVIPPDDPEILMQQGEFLNYDIMLGVNQGEGLKFVEG-VVDPEDGVSQDFDYSVS  | 434 |
| hNLGN3   | 376 | PVIDGDVIPPDDPEILMQQGEFLNYDIMLGVNQGEGLKFVEG-VVDPEDGVSQDFDYSVS  | 434 |
| mNLGN1   | 378 | PVIDGDVIPPDDPQILMQQGEFLNYDIMLGVNQGEGLKFVEN-IVDSDGVSASDFDFAVS  | 436 |
| rNLGN1   | 378 | PVIDGDVIPPDDPQILMQQGEFLNYDIMLGVNQGEGLKFVEN-IVDSDGVSASDFDFAVS  | 436 |
| hNLGN1   | 375 | PVIDGDVIPPDDPQILMQQGEFLNYDIMLGVNQGEGLKFVEN-IVDSDGVSASDFDFAVS  | 433 |
| mNLGN2   | 353 | PVVDGDDVPPDDPEILMQQGEFLNYDMLIGVNQGEGLKFVED-SAESEDGVSASAFDFTVS | 411 |
| rNLGN2   | 353 | PVVDGDDVPPDDPEILMQQGEFLNYDMLIGVNQGEGLKFVED-SAESEDGVSASAFDFTVS | 411 |
| hNLGN2   | 353 | PVVDGDDVPPDDPEILMQQGEFLNYDMLIGVNQGEGLKFVED-SAESEDGVSASAFDFTVS | 411 |
| mNLGN4   | 363 | PTVDGDVIPPDDPQILMQQGEFLNYDIMLGVNQGEGLKFVVDG-IVDSDGVSASDFDFAVS | 422 |
| hNLGN4-X | 342 | PVIDGDVIPPDDPQILMQQGEFLNYDIMLGVNQGEGLKFVDG-IVDSDGVSASDFDFAVS  | 400 |
| hNLGN4-Y | 342 | PVIDGDVIPPDDPQILMQQGEFLNYDIMLGVNQGEGLKFVDG-IVDSDGVSASDFDFAVS  | 400 |
|          |     |                                                               |     |
| mNLGN3   | 601 | WKHLVPHLYNLH---DMFHYTST---TTKVPPDTHSS-----HITRRPNGKTWS        | 645 |
| rNLGN3   | 624 | WKHLVPHLYNLH---DMFHYTST---TTKVPPDTHSS-----HITRRPNGKTWS        | 668 |
| hNLGN3   | 624 | WKHLVPHLYNLH---DMFHYTST---TTKVPPDTHSS-----HITRRPNGKTWS        | 668 |
| mNLGN1   | 626 | WLELVPHLHNLN---DISQYT-----STTTKV-----PSTDITLRFTRK             | 661 |
| rNLGN1   | 626 | WLELVPHLHNLN---DISQYT-----STTTKV-----PSTDITLRFTRK             | 661 |
| hNLGN1   | 623 | WLELVPHLHNLN---DISQYT-----STTTKV-----PSTDITLRFTRK             | 658 |
| mNLGN2   | 601 | WLELVPHLHNLH---TELFTT-----TTRLPPYATRPPP-----RTPGPGTSGTRR      | 643 |
| rNLGN2   | 601 | WLELVPHLHNLH---TELFTT-----TTRLPPYATRPPP-----RTPGPGTSGTRR      | 643 |
| hNLGN2   | 601 | WLELVPHLHNLH---TELFTT-----TTRLPPYATRPPP-----RPPA-GAPGTRR      | 642 |
| mNLGN4   | 663 | WLELVPHLGLAA---DPGAYLSAA---ATRAAPSGDPPDRDPGGGGGRRRPPATRRPAV   | 717 |
| hNLGN4-X | 590 | WLELVPHLHNLNEIFQYVSTTTTKVPPDMTSFPYGTTRSP-----AKIWPPTTKRPAI    | 641 |
| hNLGN4-Y | 590 | WLELVPHLHNLNEIFQYVSTTTTKVPPDMTSFPYGTTRSP-----AKIWPPTTKRPAI    | 641 |

**Supplementary Fig. 4: Structure of the apo-NLGN3 ECD dimer.** **a**, Overall structure of the NLGN3 dimer. The coloring scheme is the same as that in Fig. 3a. **b**, SEC-MALS analyses of wild type (blue) and the R448C mutant (red) of mouse NLGN3 ECD. Chromatograms and determined molar masses are shown. **c**, Amino-acid sequence alignment of NLGN1–NLGN4. The PTP $\delta$ -interacting residues of mNLGN3, except Gly225, are indicated by red inverted triangles. NLGN3 residues critical for binding to both PTP $\delta$  and NRXN, and the corresponding residues of other NLGNs, are highlighted by yellow boxes. NLGN3 residues critical for binding to NRXN but not to PTP $\delta$  and the corresponding residues of other NLGNs are highlighted by white letters in brown boxes. m, *Mus musculus*; r, *Rattus norvegicus*; h, *Homo sapiens*.

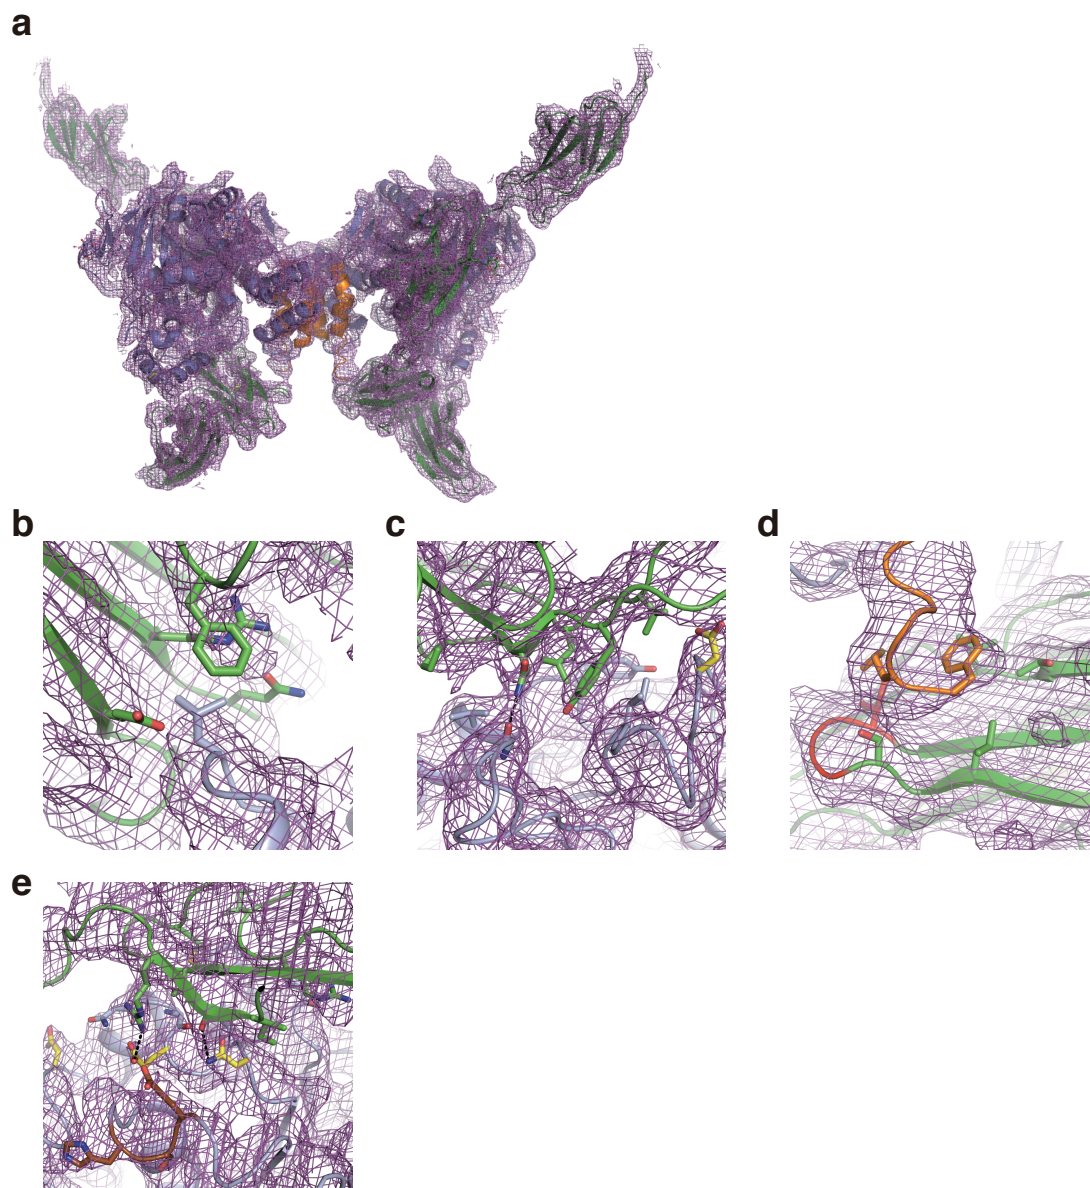

**Supplementary Fig. 5: Electron density map of the NLGN3–PTP $\delta$ A3B<sup>-</sup> complex.**

**a**, Overall view covering the dimeric complex, corresponding to Fig. 3a. **b-d**, Close-up views showing the NLGN3  $\alpha/\beta$ -hydrolase-fold core/PTP $\delta$  Ig1 interface (**b**), NLGN3  $\alpha/\beta$ -hydrolase-fold core/PTP $\delta$  Ig2 interface (**c**), and NLGN3 ECD C-terminal/PTP $\delta$  Ig2 interface (**d**), corresponding to Fig. 4a,b,c, respectively. **e**, Close-up view showing the NLGN3/PTP $\delta$  Ig3 interface, corresponding to Fig. 4d. A 2Fo–Fc map contoured at 1.0  $\sigma$  level is shown as mesh with the model of the complex.

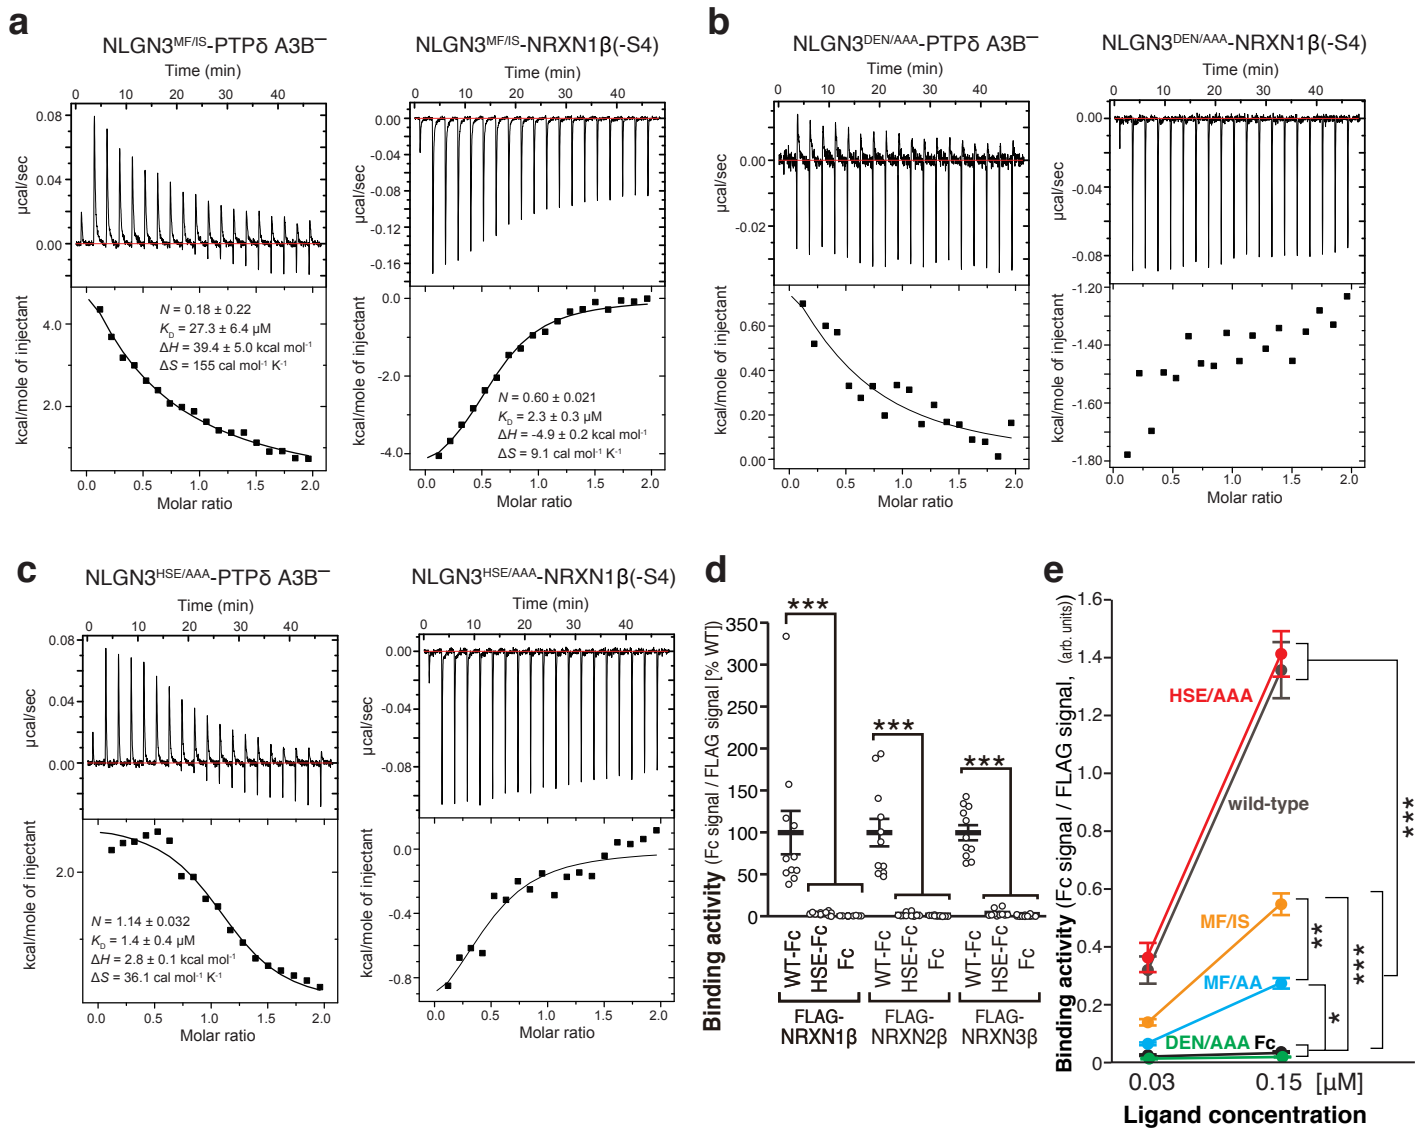

**Supplementary Fig. 6: Binding properties of NLGN3 mutants to PTPδA3B<sup>-</sup> and NRXN1β.**

**a**, ITC titration of PTPδA3B<sup>-</sup> Ig1–Fn1 (left) and NRXN1β (right) to NLGN3 MF/IS. **b**, ITC titration of PTPδA3B<sup>-</sup> Ig1–Fn1 (left) and NRXN1β (right) to NLGN3 DEN/AAA. **c**, ITC titration of PTPδA3B<sup>-</sup> Ig1–Fn1 (left) and NRXN1β (right) to NLGN3 HSE/AAA. The calculated thermodynamic parameters are also listed in **a** and **c**. The error of  $K_D$  was estimated by dividing the error of  $K_A$  by  $K_A^2$ . **d**, Ratios of cell surface staining signals for ECDs of wild-type NLGN3 and NLGN3 HSE/AAA fused to Fc and FLAG-NRXN1β, FLAG-NRXN2β, and FLAG-NRXN3β expressed on HEK293T cells (n = 11 cells each). **e**, Ratios of cell surface staining signals for mutated forms and wild-type of NLGN3 ECDs fused to Fc and FLAG-PTPδA3B<sup>-</sup> expressed on HEK293T cells (n = 29, 24, 19, 26, 26, 26 cells for 0.03 µM wild-type, HSE/AAA, MF/IS, MF/AA, DEN/AAA and Fc, respectively; n = 27, 27, 26, 26, 26 and 24 cells for 0.15 µM wild-type, HSE/AAA, MF/IS, MF/AA, DEN/AAA and Fc, respectively).

\*p < 0.05, \*\*p < 0.01, and \*\*\*p < 0.001, Tukey' s post hoc test. Data are mean ± s.e.m.

See Supplementary Table 4 for additional statistics and exact p values.

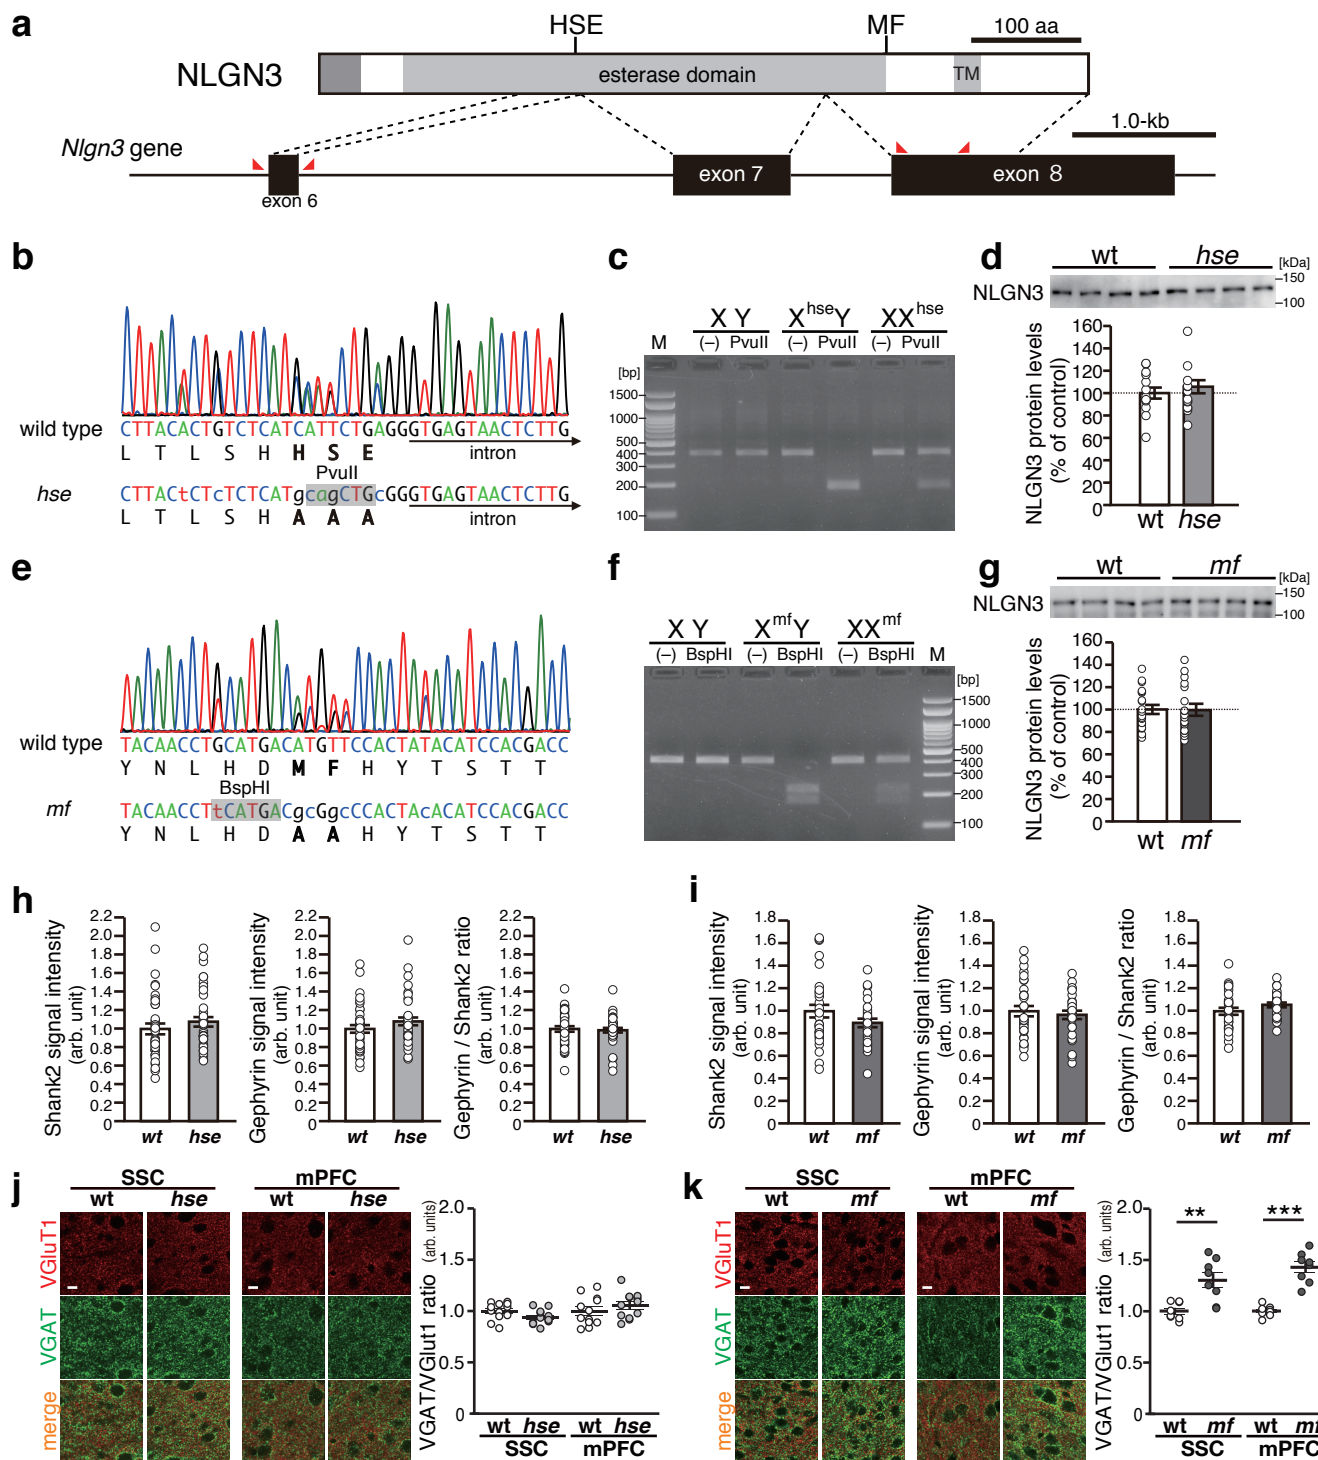

**Supplementary Fig. 7: Generation of *Nlgn3<sup>hse</sup>* and *Nlgn3<sup>mf</sup>* mutant mice.** **a**, Structures of the NLGN3 protein and *Nlgn3* gene. **b**, Nucleotide sequence of genomic PCR fragment of *Nlgn3* exon 6 from *Nlgn3<sup>hse</sup>* heterozygous female mouse. **c**, Patterns of PvuII-digested PCR fragment of *Nlgn3* exon 6 from wild-type male, *Nlgn3<sup>hse</sup>* male, and *Nlgn3<sup>hse</sup>* heterozygous female mouse. **d**, A representative immunoblot (top) and quantification of expression levels (bottom) of NLGN3 in *Nlgn3<sup>hse</sup>* mutant mice and their wild-type littermates (N = 14 male mice each). **e**, Nucleotide sequence of genomic PCR fragment of *Nlgn3* exon 8 from *Nlgn3<sup>mf</sup>* heterozygous female mouse. **f**, Patterns of BspHI-digested PCR fragment of *Nlgn3* exon 8 from wild-type male, *Nlgn3<sup>mf</sup>* male, and *Nlgn3<sup>mf</sup>* heterozygous female mouse. **g**, A representative immunoblot (top) and quantification of expression levels (bottom) of NLGN3 protein in *Nlgn3<sup>mf</sup>* mutant mice and their wild-type littermates (N = 18 and 20 male mice, respectively). **h** and **i**, Shank2 and Gephyrin immunostaining signal intensity in cultured cortical neurons from *Nlgn3<sup>hse</sup>* (n = 39 optical fields) and their littermate controls (n = 38 optical fields) (**h**) and those from *Nlgn3<sup>mf</sup>* (n = 28 optical fields) and their littermate controls (n = 31 optical fields) (**i**). Gephyrin/Shank2 signal ratios are shown on the right. **j** and **k**, Immunohistochemistry for VGluT1 and VGAT in somatosensory cortex (SSC) and medial prefrontal cortex (mPFC) of *Nlgn3<sup>hse</sup>* (**j**) and *Nlgn3<sup>mf</sup>* (**k**) mutant mice. Ratios of staining signal intensity for VGAT and VGluT1 are quantified on the right (n = 12 slices from 3 mice each for *Nlgn3<sup>hse</sup>* and wild-type control; n = 8 slices from 2 mice each for *Nlgn3<sup>mf</sup>* and wild-type control). Scale bars, 10  $\mu$ m. Data are mean  $\pm$  s.e.m. \*\*p < 0.01 and \*\*\* p < 0.001, two-sided Mann-Whitney U-test. See Supplementary Table 4 for additional statistics and exact p values.

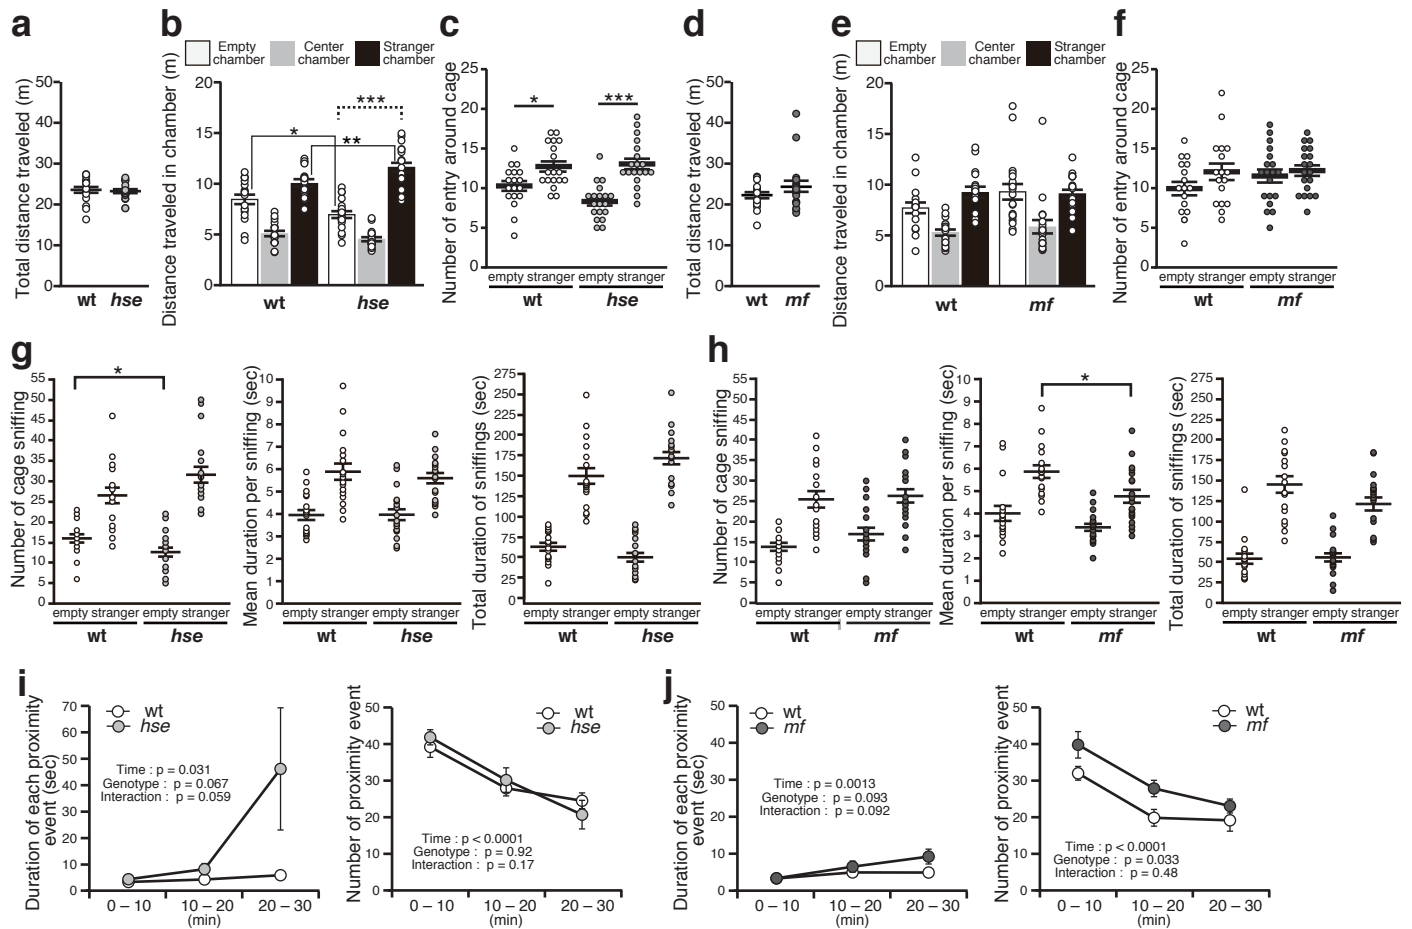

**Supplementary Fig. 8: Social behavior of *Nlgn3<sup>hse</sup>* and *Nlgn3<sup>mf</sup>* mice.** **a–h**, Total distance (**a** and **d**), distance traveled in each chamber (**b** and **e**), number of entry around empty and stranger cages (**c** and **f**), and cage sniffing behavior of *Nlgn3<sup>hse</sup>* and their littermate wild-type mice (**a–c**, **g**) (N = 19 and 18 for *Nlgn3<sup>hse</sup>* and littermate wild-type, respectively) and *Nlgn3<sup>mf</sup>* and their littermate wild-type mice (**d–f**, **h**) (N = 19 and 17 for *Nlgn3<sup>mf</sup>* and littermate wild-type, respectively) during three-chamber sociability tests. For cage sniffing behavior (**g** and **h**), number of cage sniffing (left), mean duration of each sniffing (middle), and total duration of sniffing (right) are quantified. **i** and **j**, Averaged duration of each proximity event (left) and number of proximity events (right) during 30 minutes reciprocal social interaction test of *Nlgn3<sup>hse</sup>* mutant mice (**i**) (N = 13 and 14 pairs for *Nlgn3<sup>hse</sup>* and littermate wild-type, respectively) and *Nlgn3<sup>mf</sup>* mutant mice (**j**) (N = 14 and 13 pairs for *Nlgn3<sup>mf</sup>* and littermate wild-type, respectively) are presented. Data are mean ± s.e.m. \*p < 0.05, \*\*p < 0.01 and \*\*\*p < 0.001, Two-sided Student's t-test in **b**, **c**, **g** and **h** and Bonferroni post-test in **b** (comparison with dotted line). See Supplementary Table 4 for additional statistics and exact p values.



**Supplementary Table 1. A list of membrane proteins identified from PTP $\delta$ A3B<sup>-</sup>-Fc**

**coated beads.**

| Bait                               | Protein <sup>a</sup> | Probability <sup>b</sup> | Score <sup>c</sup> | Hits <sup>d</sup> |
|------------------------------------|----------------------|--------------------------|--------------------|-------------------|
| PTP $\delta$ -A3B <sup>-</sup> -Fc | GluN2B               | 5.37E-09                 | 44.2               | 7                 |
|                                    | NLGN3                | 7.66E-09                 | 10.22              | 2                 |
|                                    | TMEM14A              | 3.68E-06                 | 10.08              | 1                 |
|                                    | NCAM1                | 2.91E-05                 | 90.22              | 10                |

Protein<sup>a</sup>, proteins with probability value (<1.0E-04) are listed; Probability<sup>b</sup>, probability (protein) of finding a match as good as or better than the observed match by chance;

Score<sup>c</sup>, SEQUEST scores; Hits<sup>d</sup>, number of unique parent peptides found.

**Supplementary Table 2. Data collection and refinement statistics.**

|                                       | NLGN3 ECD             | NLGN3 ECD-PTP $\delta$ Ig1-Fn1 |
|---------------------------------------|-----------------------|--------------------------------|
| Data collection                       |                       |                                |
| Wavelength (Å)                        | 1.0000                | 1.0000                         |
| Resolution (Å)                        | 50.0–2.76 (2.81–2.76) | 50.0–3.85 (3.92–3.85)          |
| Space group                           | $P2_12_12_1$          | $P3_212$                       |
| Cell dimensions                       |                       |                                |
| $a, b, c$ (Å)                         | 65.8, 167.1, 177.9    | 96.1, 96.1, 371.6              |
| $\alpha, \beta, \gamma$ (°)           | 90.0, 90.0, 90.0      | 90.0, 90.0, 120.0              |
| Completeness (%)                      | 99.1 (98.7)           | 100 (100)                      |
| $CC_{1/2}$                            | (0.518)               | (0.570)                        |
| $R_{\text{sym}}$ (%)                  | 11.1 (39.8)           | 19.6 (182.1)                   |
| $\  \sigma I$                         | 12.2 (1.8)            | 15.1 (0.98)                    |
| Redundancy                            | 7.7 (4.8)             | 18.7 (14.3)                    |
| Refinement                            |                       |                                |
| Resolution (Å)                        | 49.7–2.76             | 49.7–3.85                      |
| No. reflections                       | 50,376                | 19,070                         |
| No. atoms                             |                       |                                |
| Protein                               | 8,374                 | 7,217                          |
| Sugar                                 | 56                    | 56                             |
| Water                                 | 59                    | –                              |
| $R_{\text{work}}/R_{\text{free}}$     | 0.218 / 0.251         | 0.253 / 0.289                  |
| R.m.s.d.                              |                       |                                |
| Bond lengths (Å)                      | 0.003                 | 0.002                          |
| Bond angles (°)                       | 0.871                 | 0.499                          |
| Average $B$ -factor (Å <sup>2</sup> ) |                       |                                |
| Protein                               | 70.5                  | 189.2                          |
| Sugar                                 | 128.2                 | 239.0                          |
| Water                                 | 59.4                  | –                              |
| Ramachandran plot                     |                       |                                |
| Most favored (%)                      | 97.1                  | 94.8                           |
| Disallowed (%)                        | 0                     | 0                              |

Values in parentheses are for the highest-resolution shell.

**Supplementary Table 3. Primer and ssODN sequences used in this study.**

| name                                                    | sequence                                                                                                                 |
|---------------------------------------------------------|--------------------------------------------------------------------------------------------------------------------------|
| <b>Construction of expression vectors</b>               |                                                                                                                          |
| Nlgn2-Cla-S                                             | 5'-ATCGATAGGCAGCCTCGGGGAGGAG-3'                                                                                          |
| Nlgn2-Sal-A                                             | 5'-GTCGACCTATACCCGAGTGGTGGAGTG-3'                                                                                        |
| Nlgn3-ERI-S2                                            | 5'-GAATTCAACCCAGGCCCGGCACCC-3'                                                                                           |
| Nlgn3-Sal-A                                             | 5'-GTCGACCTATACACGGGTAGTGGAGTGTG-3'                                                                                      |
| Nlgn4-ERI-S                                             | 5'-GATATCGCGCTCGCCACGCTATACC-3'                                                                                          |
| Nlgn4-RV-A                                              | 5'-GAATTCATCCCCGCCGCCGCCGCC-3'                                                                                           |
| <b>Crystallization</b>                                  |                                                                                                                          |
| Xho-Nlgn3-S                                             | 5'-CCGGCTCGAGGCCACCATGTGGCTGCAGCCCTCGCT-3'                                                                               |
| Not-Nlgn3-2052                                          | 5'-CCGATGCGGCCGCTCAGTGATGGTGTGGTGTGTTTCAGTGGAGTAGTCACGAG-3'                                                              |
| <b>Generation of neuron-specific NLGN3 KO mice</b>      |                                                                                                                          |
| Nlgn3-GT-A                                              | 5'-TGTACCAGGAATGGAAGCAG-3'                                                                                               |
| Nlgn3-GT-B                                              | 5'-GGTCAGAGCTGTCATTGTCAC-3'                                                                                              |
| Nlgn3-GT-C                                              | 5'-AGCAAGAGCTCTACTACCTCC-3'                                                                                              |
| Cre-S                                                   | 5'-AGGTTCTTCACTCATGGA-3'                                                                                                 |
| Cre-A                                                   | 5'-TCGACCAGTTTAGTTACCC-3'                                                                                                |
| <b>Generation of Nlgn3mf and Nlgn3hse knock-in mice</b> |                                                                                                                          |
| gRNA-E6T2                                               | 5'-CAGAATGATGAGACAGTGTAAGG-3'                                                                                            |
| E6-ssODN1                                               | 5'-ACTGTCTTTGGCTCTGGCATCGGTGCATCCTGTGTCAGTCTCCTTACTCTCTCTCATGC<br>AGCTGCGGGTGAGTAACTCTTGAGCATCAACAGAGAATAGCTTTTTCTTTC-3' |
| gRNA-E8T2                                               | 5'-TATAGTGGAACATGTCATGCAGG-3'                                                                                            |
| E8-ssODN                                                | 5'-AAAGGTAGCCTTTTGGAAACACCTGGTGCCCCACCTGTACAACCTTCATGACGCGGCC<br>CACTACACATCCAGCACCACCAAAGTGCCGCCCGGACACCACCCACAGCT-3'   |
| Nlgn3-E6-U2                                             | 5'-CTAGGTTTCCTGAGCACTGGAG-3'                                                                                             |
| Nlgn3-E6-L2                                             | 5'-ATAGAGGGAGTTCAGGACAGC-3'                                                                                              |
| Nlgn3-E8-U2                                             | 5'-GGCTGAAACCAAGGGTTCGTG-3',                                                                                             |
| Nlgn3-E8-L2                                             | 5'-TGCTGTGAGGCGAAGTGTGT-3'                                                                                               |
| <b>Real-time PCR</b>                                    |                                                                                                                          |
| Ptprd-725-S                                             | 5'-CACCAAGATTCTCTATCCCAC-3'                                                                                              |
| Ptprd-941-A                                             | 5'-GTCGACATAGCAACACAGGTG-3'                                                                                              |
| Gapdh-S                                                 | 5'-ACATCATCCCTGCATCCACTGG-3'                                                                                             |
| Gapdh-A                                                 | 5'-TCCTCAGTGTAGCCCAAGATGC-3'                                                                                             |
| Ptprd-460-S                                             | 5'-TGTGCAGCCAGCGGTAATCCG-3'                                                                                              |
| Ptprd-1907-A                                            | 5'-ATCTCCCAAGACAGCAGCACTG-3'                                                                                             |
| PtprdA3-S                                               | 5'-TTACGATCAGAATCTATTGGAGCC-3'                                                                                           |
| PtprdB-A                                                | 5'-GGGACACGGCGAACTCTGAC-3'                                                                                               |

**Supplementary Table 4. Exact p values for the indicated statistical tests.**

**Fig. 1b**

Staining signal intensity

Tukey-Kramer HSD test (two-sided)

|                           | p-Value (Prob> t ) |
|---------------------------|--------------------|
| Shank2, PTPδ A9B+ vs Fc   | <.0001             |
| Shank2, PTPδ A6B+ vs Fc   | 0.0102             |
| Shank2, PTPδ A3B+ vs Fc   | 0.0402             |
| Shank2, PTPδ A-B+ vs Fc   | 0.384              |
| Shank2, PTPδ A9B- vs Fc   | <.0001             |
| Shank2, PTPδ A6B- vs Fc   | <.0001             |
| Shank2, PTPδ A3B- vs Fc   | <.0001             |
| Shank2, PTPδ A-B- vs Fc   | 0.484              |
| Shank2, NRXN1β vs Fc      | <.0001             |
| Gephyrin, PTPδ A9B+ vs Fc | 1                  |
| Gephyrin, PTPδ A6B+ vs Fc | 0.998              |
| Gephyrin, PTPδ A3B+ vs Fc | 1                  |
| Gephyrin, PTPδ A-B+ vs Fc | 0.994              |
| Gephyrin, PTPδ A9B- vs Fc | <.0001             |
| Gephyrin, PTPδ A6B- vs Fc | <.0001             |
| Gephyrin, PTPδ A3B- vs Fc | 0.0001             |
| Gephyrin, PTPδ A-B- vs Fc | 0.132              |
| Gephyrin, NRXN1β vs Fc    | <.0001             |

**Fig. 2c**

Binding activity (Fc signal/FLAG signal)

Dunnett test (two-sided)

vs. Control group (Fc)

|           | p-Value (Prob> t ) |
|-----------|--------------------|
| PTPδ A9B+ | 1                  |
| PTPδ A3B+ | 1                  |
| PTPδ A6B+ | 1                  |
| PTPδ A-B+ | 1                  |
| PTPδ A9B- | 0.0013             |
| PTPδ A6B- | <.0001             |
| PTPδ A3B- | <.0001             |
| PTPδ A-B- | 0.97               |
| NRXN1β    | <.0001             |

Tukey-Kramer HSD test (two-sided)

vs. PTPδ A3B+

|                        | p-Value (Prob> t ) |
|------------------------|--------------------|
| PTPδ A3B+ vs PTPδ A9B+ | <.0001             |
| PTPδ A3B+ vs PTPδ A6B+ | <.0001             |
| PTPδ A3B+ vs PTPδ A3B+ | <.0001             |
| PTPδ A3B+ vs PTPδ A-B+ | <.0001             |
| PTPδ A3B+ vs PTPδ A9B- | <.0001             |
| PTPδ A3B+ vs PTPδ A6B- | <.0001             |
| PTPδ A3B+ vs PTPδ A-B- | <.0001             |

**Fig. 2g**

Signal intensity

Tukey-Kramer HSD test (two-sided)

|                                          | p-Value (Prob> t ) |
|------------------------------------------|--------------------|
| Shank2, Fc (wt) vs Fc (KO)               | 1                  |
| Shank2, PTPδ A9B+ (wt) vs PTPδ A9B+ (KO) | 0.999              |
| Shank2, PTPδ A3B- (wt) vs PTPδ A3B- (KO) | <.0001             |
| Shank2, PTPδ A9B+ (wt) vs Fc (wt)        | <.0001             |
| Shank2, PTPδ A9B+ (KO) vs Fc (wt)        | <.0001             |
| Shank2, PTPδ A3B- (wt) vs Fc (wt)        | <.0001             |

|                                            |        |
|--------------------------------------------|--------|
| Shank2, PTPδ A3B- (KO) vs Fc (wt)          | 0.915  |
| Shank2, PTPδ A9B+ (wt) vs Fc (KO)          | <.0001 |
| Shank2, PTPδ A9B+ (KO) vs Fc (KO)          | <.0001 |
| Shank2, PTPδ A3B- (wt) vs Fc (KO)          | <.0001 |
| Shank2, PTPδ A3B- (KO) vs Fc (KO)          | 0.989  |
| Shank2, PTPδ A9B+ (wt) vs PTPδ A3B- (wt)   | 1      |
| Shank2, PTPδ A9B+ (wt) vs PTPδ A3B- (KO)   | <.0001 |
| Shank2, PTPδ A9B+ (KO) vs PTPδ A3B- (KO)   | <.0001 |
| Shank2, PTPδ A3B- (wt) vs PTPδ A9B+ (KO)   | 1      |
| Gephyrin, Fc (wt) vs Fc (KO)               | 1      |
| Gephyrin, PTPδ A9B+ (wt) vs PTPδ A9B+ (KO) | 0.999  |
| Gephyrin, PTPδ A3B- (wt) vs PTPδ A3B- (KO) | <.0001 |
| Gephyrin, PTPδ A9B+ (wt) vs Fc (wt)        | 0.997  |
| Gephyrin, PTPδ A9B+ (KO) vs Fc (wt)        | 1      |
| Gephyrin, PTPδ A3B- (wt) vs Fc (wt)        | <.0001 |
| Gephyrin, PTPδ A3B- (KO) vs Fc (wt)        | 0.998  |
| Gephyrin, PTPδ A3B- (wt) vs Fc (KO)        | <.0001 |
| Gephyrin, PTPδ A9B+ (wt) vs Fc (KO)        | 0.998  |
| Gephyrin, PTPδ A9B+ (KO) vs Fc (KO)        | 1      |
| Gephyrin, PTPδ A3B- (KO) vs Fc (KO)        | 0.998  |
| Gephyrin, PTPδ A3B- (wt) vs PTPδ A9B+ (wt) | <.0001 |
| Gephyrin, PTPδ A9B+ (wt) vs PTPδ A3B- (KO) | 1      |
| Gephyrin, PTPδ A3B- (wt) vs PTPδ A9B+ (KO) | <.0001 |
| Gephyrin, PTPδ A3B- (wt) vs PTPδ A9B+ (KO) | 1      |

**Fig. 2h**

Cell surface PTPδ A3B- Fc signal intensity

Analysis of Variance

two-sided

| Source  | DF  | F ratio | p-value (Prob>F) |
|---------|-----|---------|------------------|
| Model   | 20  | 16.4378 | <.0001           |
| Error   | 273 |         |                  |
| C.Total | 293 |         |                  |

Effect tests

| Source                               | DF | F Ratio | p-value (Prob>F) |
|--------------------------------------|----|---------|------------------|
| Competitor Concentration             | 6  | 21.9313 | <.0001           |
| Competitors                          | 2  | 62.8005 | <.0001           |
| Competitor Concentration*Competitors | 12 | 5.9639  | <.0001           |

Tukey-Kramer HSD test (two-sided)

|                                         | p-Value (Prob> t ) |
|-----------------------------------------|--------------------|
| 0 μM PTPδ A3B- vs 0.1 uM 0 μM PTPδ A3B- | 0.0002             |
| 0 μM PTPδ A3B- vs 0.3 μM PTPδ A3B-      | <.0001             |
| 0 μM PTPδ A3B- vs 1 μM PTPδ A3B-        | <.0001             |
| 0 μM PTPδ A3B- vs 3 μM PTPδ A3B-        | <.0001             |
| 0 μM NRXN1β vs 1 uM NRXN1β              | <.0001             |
| 0 μM NRXN1β vs 3 uM NRXN1β              | <.0001             |

**Fig. 4g**

NRXN1β-Fc pulldown

Tukey-Kramer HSD test

two-sided

|               | p-Value (Prob> t ) |
|---------------|--------------------|
| WT vs HSE/AAA | 0.0005             |
| WT vs DEN/AAA | 0.0003             |

PTPδ A3B--Fc pulldown

Tukey-Kramer HSD test

two-sided

|               | p-Value (Prob> t ) |
|---------------|--------------------|
| WT vs MF/IS   | <.0001             |
| WT vs MF/AA   | <.0001             |
| WT vs DEN/AAA | <.0001             |

**Fig. 5a**

Signal intensity  
NRXN1 $\beta$  beads  
t-test

|                          | two-sided<br>p-Value (Prob> t ) |
|--------------------------|---------------------------------|
| Shank2, wt vs Nlgn3hse   | 0.00028                         |
| Gephyrin, wt vs Nlgn3hse | 0.0128                          |

PTP $\delta$  A3B- beads

|                          | two-sided<br>p-Value (Prob> t ) |
|--------------------------|---------------------------------|
| Shank2, wt vs Nlgn3hse   | 0.584                           |
| Gephyrin, wt vs Nlgn3hse | 0.0173                          |

**Fig. 5b**

Signal intensity  
NRXN1 $\beta$  beads  
t-test

|                         | two-sided<br>p-Value (Prob> t ) |
|-------------------------|---------------------------------|
| Shank2, wt vs Nlgn3mf   | 0.0979                          |
| Gephyrin, wt vs Nlgn3mf | 0.0007969                       |

PTP $\delta$  A3B- beads

|                         | two-sided<br>p-Value (Prob> t ) |
|-------------------------|---------------------------------|
| Shank2, wt vs Nlgn3mf   | 1.50E-08                        |
| Gephyrin, wt vs Nlgn3mf | 4.94E-09                        |

**Fig. 5c**

NLGN3 signal intensity  
Analysis of Variance

| Source        | DF  | F ratio | p-value (Prob>F) |
|---------------|-----|---------|------------------|
| Bead Genotype | 5   | 34.5694 | <.0001           |
| Error         | 194 |         |                  |
| C.Total       | 199 |         |                  |

Tukey-Kramer HSD test (two-sided)

|                                         | p-Value (Prob> t ) |
|-----------------------------------------|--------------------|
| NRXN1 $\beta$ beads, wt vs Nlgn3hse     | 0.0221             |
| PTP $\delta$ A3B- beads, wt vs Nlgn3hse | 0.0012             |

**Fig. 5d**

NLGN3 signal intensity  
Analysis of Variance

| Source        | DF  | F ratio | p-value (Prob>F) |
|---------------|-----|---------|------------------|
| Bead Genotype | 5   | 19.3546 | <.0001           |
| Error         | 156 |         |                  |
| C.Total       | 161 |         |                  |

Tukey-Kramer HSD test (two-sided)

|                                        | p-Value (Prob> t ) |
|----------------------------------------|--------------------|
| NRXN1 $\beta$ beads, wt vs Nlgn3mf     | <.0001             |
| PTP $\delta$ A3B- beads, wt vs Nlgn3mf | 0.0008             |

**Fig. 5e**

co-IP Efficiency (PTP $\delta$ /NLGN3)  
t-test (two-sided)

|                | p-Value (Prob> t ) |
|----------------|--------------------|
| wt vs Nlgn3hse | 0.0062             |
| wt vs Nlgn3mf  | 0.00026            |

**Fig. 5f**

Time spent in chamber (sec)

Bonferroni test (two-sided)

|                        | p-value  |
|------------------------|----------|
| wt, Empty vs Center    | 2.64E-09 |
| wt, Empty vs Stranger  | 0.0019   |
| wt, Center vs Empty    | 7.71E-13 |
| hse, Empty vs Center   | 4.14E-09 |
| hse, Empty vs Stranger | 1.34E-06 |
| hse, Center vs Empty   | 7.73E-14 |

t-test (two-sided)

|                             | p-Value (Prob> t ) |
|-----------------------------|--------------------|
| Empty chamber, wt vs hse    | 0.0326             |
| Center chamber, wt vs hse   | 0.175              |
| Stranger chamber, wt vs hse | 0.0138             |

**Fig. 5g**

Preference index

Wilcoxon (Mann U Tests (Rank Sums))

|           | p-value (Prob> Z ) |
|-----------|--------------------|
| wt vs hse | 0.0102             |

**Fig. 5h**

Time spent in chamber (sec)

Bonferroni test (two-sided)

|                       | p-value  |
|-----------------------|----------|
| wt, Empty vs Center   | 2.33E-07 |
| wt, Empty vs Stranger | 0.0071   |
| wt, Center vs Empty   | 7.55E-10 |
| mf, Empty vs Center   | 2.61E-07 |
| mf, Empty vs Stranger | 0.111    |
| mf, Center vs Empty   | 1.51E-10 |

t-test (two-sided)

|                            | p-Value (Prob> t ) |
|----------------------------|--------------------|
| Empty chamber, wt vs mf    | 0.292              |
| Center chamber, wt vs mf   | 0.743              |
| Stranger chamber, wt vs mf | 0.225              |

**Fig. 5i**

Preference index

Wilcoxon (Mann U Tests (Rank Sums))

|          | p-value (Prob> Z ) |
|----------|--------------------|
| wt vs mf | 0.506              |

**Fig. 5j**

Total duration of proximity event (sec)

Analysis of Variance : Total duration of proximity event (sec)

|                                 | DF | F ratio | p-value (Prob>F) |
|---------------------------------|----|---------|------------------|
| Genotype                        | 1  | 9.133   | 0.0057           |
| Subject(Group)                  | 25 |         |                  |
| Total duration                  | 2  | 4.363   | 0.0179           |
| Total duration * Genotype       | 2  | 3.816   | 0.0287           |
| Total duration * Subject(Group) | 50 |         |                  |

t-test (two-sided)

|  | p-Value (Prob> t ) |
|--|--------------------|
|  |                    |

|                      |        |
|----------------------|--------|
| 0-10 min, wt vs hse  | 0.0448 |
| 10-20 min, wt vs hse | 0.0148 |
| 20-30 min, wt vs hse | 0.0165 |

**Fig. 5l**

Total duration of proximity event (sec)

Analysis of Variance : Total duration of proximity event (sec)

|                                | DF | F ratio | p-value (Prob>F) |
|--------------------------------|----|---------|------------------|
| Genotype                       | 1  | 8.396   | 0.0077           |
| Subject(Group)                 | 25 |         |                  |
| Totalduration                  | 2  | 2.035   | 0.1414           |
| Totalduration * Genotype       | 2  | 4.075   | 0.0229           |
| Totalduration * Subject(Group) | 50 |         |                  |

t-test (two-sided)

|                     | p-Value (Prob> t ) |
|---------------------|--------------------|
| 0-10 min, wt vs mf  | 0.111              |
| 10-20 min, wt vs mf | 0.0114             |
| 20-30 min, wt vs mf | 0.013              |

**Fig. 5m**

Elevated head-head contact

Analysis of Variance : Elevated head-head contact

two-sided

|                               | DF | F ratio | p-value (Prob>F) |
|-------------------------------|----|---------|------------------|
| Genotype                      | 1  | 2.355   | 0.1374           |
| Subject(Group)                | 25 |         |                  |
| Head to head                  | 2  | 0.49    | 0.6155           |
| Head to head * Genotype       | 2  | 5.281   | 0.0083           |
| Head to head * Subject(Group) | 50 |         |                  |

t-test (two-sided)

|                     | p-Value (Prob> t ) |
|---------------------|--------------------|
| 0-10 min, wt vs mf  | 0.796              |
| 10-20 min, wt vs mf | 0.0072             |
| 20-30 min, wt vs mf | 0.533              |

**Fig. 5p**

Rotarod, Terminal speed (rpm)

Analysis of Variance : Trial 1-12

| Group                      | DF  | F ratio | p-value (Prob>F) |
|----------------------------|-----|---------|------------------|
| Genotpe                    | 1   | 12.503  | 0.0007           |
| Subject(Group)             | 70  |         |                  |
| Trial1-12                  | 11  | 29.091  | <.0001           |
| Trial1-12 * Genotpe        | 11  | 1.274   | 0.2349           |
| Trial1-12 * Subject(Group) | 770 |         |                  |

t-test (two-sided)

|                    | p-Value (Prob> t ) |
|--------------------|--------------------|
| Trial 1, wt vs mf  | 0.207              |
| Trial 2, wt vs mf  | 0.00099            |
| Trial 3, wt vs mf  | 0.04469            |
| Trial 4, wt vs mf  | 0.00489            |
| Trial 5, wt vs mf  | 0.00229            |
| Trial 6, wt vs mf  | 0.0263             |
| Trial 7, wt vs mf  | 0.001884           |
| Trial 8, wt vs mf  | 0.00153            |
| Trial 9, wt vs mf  | 0.00287            |
| Trial 10, wt vs mf | 0.0108             |



|                    |         |
|--------------------|---------|
| Trial 11, wt vs mf | 0.0294  |
| Trial 12, wt vs mf | 0.00625 |

**Fig. 6b**

Pulldown efficiency (% WT)

Tukey-Kramer HSD test (two-sided)

|                                      | p-Value (Prob> t ) |
|--------------------------------------|--------------------|
| NRXN1 $\beta$ -Fc, WT vs R/C         | 0.0246             |
| NRXN1 $\beta$ -Fc, WT vs DEN         | 0.0026             |
| PTP $\delta$ A3B $^-$ -Fc, WT vs R/C | 0.0008             |
| PTP $\delta$ A3B $^-$ -Fc, WT vs DEN | 0.0002             |

**Fig. 6c**

Shank2 and Gephyrin signal intensity

Tukey-Kramer HSD test (two-sided)

|                                             | p-Value (Prob> t ) |
|---------------------------------------------|--------------------|
| Shank2, Fc, wt vs R/C                       | 1                  |
| Shank2, NRXN1 $\beta$ , wt vs R/C           | 0.0832             |
| Shank2, PTP $\delta$ A3B $^-$ , wt vs R/C   | 0.0231             |
| Gephyrin, Fc, wt vs R/C                     | 1                  |
| Gephyrin, NRXN1 $\beta$ , wt vs R/C         | <.0001             |
| Gephyrin, PTP $\delta$ A3B $^-$ , wt vs R/C | 0.0177             |

**Fig. 6d**

Protein levels

t-test (two-sided)

|                     | p-Value (Prob> t ) |
|---------------------|--------------------|
| PSD95, wt vs hse    | 0.85               |
| VGluT1, wt vs hse   | 0.787              |
| Gephyrin, wt vs hse | 0.776              |
| VGAT, wt vs hse     | 0.562              |
| VAMP2, wt vs hse    | 0.854              |
| PSD95, wt vs mf     | 0.99               |
| VGluT1, wt vs mf    | 0.57               |
| Gephyrin, wt vs mf  | 0.000468           |
| VGAT, wt vs mf      | 0.00222            |
| VAMP2, wt vs mf     | 0.47               |

**Fig. 6e**

Frequency and amplitude of mEPSC and mIPSC

t-test (two-sided)

|                            |        |
|----------------------------|--------|
| mEPSC frequency, wt vs hse | 0.555  |
| mEPSC amplitude, wt vs hse | 0.1645 |
| mIPSC frequency, wt vs hse | 0.399  |
| mIPSC amplitude, wt vs hse | 0.0557 |

**Fig. 6f**

Frequency and amplitude of mEPSC and mIPSC

t-test (two-sided)

|                           |             |
|---------------------------|-------------|
| mEPSC frequency, wt vs mf | 0.0426      |
| mEPSC amplitude, wt vs mf | 0.941       |
| mIPSC frequency, wt vs mf | 0.00645     |
| mIPSC amplitude, wt vs mf | 0.218351851 |

**Supplementary Fig. 1b**

Shank2 signal intensity

Tukey-Kramer HSD test (two-sided)

|                                                             | p-Value (Prob> t ) |
|-------------------------------------------------------------|--------------------|
| WT (PTP $\delta$ A9B $^+$ ) vs WT (Fc)                      | <.0001             |
| WT (PTP $\delta$ A9B $^+$ ) vs DKO (PTP $\delta$ A9B $^+$ ) | <.0001             |

|                            |        |
|----------------------------|--------|
| DKO (PTPδ A9B+) vs WT (Fc) | 0.0011 |
|----------------------------|--------|

### Supplementary Fig. 1d

Shank2 and Gephyrin signal intensity  
Tukey-Kramer HSD test (two-sided)

|                                             | p-Value (Prob> t ) |
|---------------------------------------------|--------------------|
| Shank2, WT (PTPδ A3B-) vs DKO (PTPδ A3B-)   | 0.545              |
| Shank2, WT (PTPδ A3B-) vs WT (Fc)           | 0.0023             |
| Shank2, DKO (PTPδ A3B-) vs WT (Fc)          | <.0001             |
| Gephyrin, WT (PTPδ A3B-) vs DKO (PTPδ A3B-) | 0.922              |
| Gephyrin, WT (PTPδ A3B-) vs WT (Fc)         | 0.0022             |
| GephyrinDKO (PTPδ A3B-) vs WT (Fc)          | 0.0066             |

### Supplementary Fig. 2a

Binding activity (Fc signal/FLAG-NLGN3 signal)  
Control group = Fc  
Dunnnett test (two-sided)

|              | p-Value (Prob> t ) |
|--------------|--------------------|
| PTPδ A3B- Fc | <.0001             |
| LAR A6B+ Fc  | 1                  |
| LAR A6B- Fc  | 0.0859             |
| LAR A-B+ Fc  | 1                  |
| LAR A-B- Fc  | 1                  |
| PTPσ A-B+ Fc | 1                  |
| PTPσ A-B- Fc | 0.964              |
| PTPσ A9B+ Fc | 1                  |

### Supplementary Fig. 2b

Binding activity  
Control group = Fc  
Dunnnett test (two-sided)

|                        | p-Value (Prob> t ) |
|------------------------|--------------------|
| NRXN1β vs NLGN1(-)     | <.0001             |
| NRXN1β vs NLGN1B       | 0.0724             |
| NRXN1β vs NLGN1A       | 0.0011             |
| NRXN1β vs NLGN1AB      | 0.456              |
| NRXN1β vs NLGN2A       | <.0001             |
| NRXN1β vs NLGN3 (-)    | <.0001             |
| NRXN1β vs NLGN3A       | <.0001             |
| NRXN1β vs NLGN4 (-)    | 0.944              |
| PTPδ A3B- vs NLGN1 (-) | 0.999              |
| PTPδ A3B- vs NLGN1B    | 0.671              |
| PTPδ A3B- vs NLGN1A    | 0.392              |
| PTPδ A3B- vs NLGN1AB   | 0.365              |
| PTPδ A3B- vs NLGN2A    | 0.996              |
| PTPδ A3B- vs NLGN3 (-) | <.0001             |
| PTPδ A3B- vs NLGN3A    | <.0001             |
| PTPδ A3B- vs NLGN4 (-) | 0.369              |

### Supplementary Fig. 2e

Binding activity (Fc signal/FLAG signal)  
NRXN1β vs NLGN3-mutants  
Tukey-Kramer HSD test (two-sided)

|                          | p-Value (Prob> t ) |
|--------------------------|--------------------|
| NLGN3-Fc vs Fc           | <.0001             |
| NLGN3-Fc vs NLGN3-LND-Fc | <.0001             |
| NLGN3-LND-Fc vs Fc       | 0.453              |

PTPδ A3B- vs NLGN3-mutants  
Tukey-Kramer HSD test (two-sided)

|                          | p-Value (Prob> t ) |
|--------------------------|--------------------|
| NLGN3-Fc vs Fc           | <.0001             |
| NLGN3-Fc vs NLGN3-LND-Fc | <.0001             |
| NLGN3-LND-Fc vs Fc       | <.0001             |

### Supplementary Fig. 2f

Binding activity (Cell surface PTP $\delta$  A3B– Fc signals)

Control group = 0  $\mu$ M MDGA1-myc-His

Dunnett test (two-sided)

|                            | p-Value (Prob> t ) |
|----------------------------|--------------------|
| 0.01 $\mu$ M MDGA1-myc-His | 1                  |
| 0.03 $\mu$ M MDGA1-myc-His | 0.998              |
| 0.1 $\mu$ M MDGA1-myc-His  | 0.952              |
| 0.3 $\mu$ M MDGA1-myc-His  | 0.218              |
| 1 $\mu$ M MDGA1-myc-His    | 0.0317             |
| 3 $\mu$ M MDGA1-myc-His    | 0.0065             |

### Supplementary Fig. 3e

Shank2 signal intensity

t-test (two-sided)

|                             | p-Value (Prob> t ) |
|-----------------------------|--------------------|
| PTP $\delta$ A9B+, wt vs KO | 0.594              |
| PTP $\delta$ A6B+, wt vs KO | 0.325              |
| PTP $\delta$ A3B+, wt vs KO | 0.854              |
| PTP $\delta$ A–B+, wt vs KO | 0.637              |
| PTP $\delta$ A9B–, wt vs KO | 1.59E-06           |
| PTP $\delta$ A6B–, wt vs KO | 7.24E-07           |
| PTP $\delta$ A3B–, wt vs KO | 0.0000679          |
| PTP $\delta$ A–B–, wt vs KO | 0.000157           |
| Fc, wt vs KO                | 0.934              |

### Supplementary Fig. 3f

Gephyrin signal intensity

t-test (two-sided)

|                             | p-Value (Prob> t ) |
|-----------------------------|--------------------|
| PTP $\delta$ A9B+, wt vs KO | 0.308              |
| PTP $\delta$ A6B+, wt vs KO | 0.742              |
| PTP $\delta$ A3B+, wt vs KO | 0.931              |
| PTP $\delta$ A–B+, wt vs KO | 0.692              |
| PTP $\delta$ A9B–, wt vs KO | 0.000356           |
| PTP $\delta$ A6B–, wt vs KO | 0.000611           |
| PTP $\delta$ A3B–, wt vs KO | 0.0101             |
| PTP $\delta$ A–B–, wt vs KO | 0.0000405          |
| Fc, wt vs KO                | 0.551              |

### Supplementary Fig. 6d

Binding activity (Fc signal/ FLAG signal)

Tukey-Kramer HSD test (two-sided)

|                                      | p-Value (Prob> t ) |
|--------------------------------------|--------------------|
| FLAG-NRXN1 $\beta$ , WT-Fc vs Fc     | 0.0001             |
| FLAG-NRXN1 $\beta$ , WT-Fc vs HSE-Fc | 0.0003             |
| FLAG-NRXN1 $\beta$ , HSE-Fc vs Fc    | 0.973              |
| FLAG-NRXN2 $\beta$ , WT-Fc vs Fc     | <.0001             |
| FLAG-NRXN2 $\beta$ , WT-Fc vs HSE-Fc | <.0001             |
| FLAG-NRXN2 $\beta$ , HSE-Fc vs Fc    | 0.999              |
| FLAG-NRXN3 $\beta$ , WT-Fc vs Fc     | <.0001             |
| FLAG-NRXN3 $\beta$ , WT-Fc vs HSE-Fc | <.0001             |
| FLAG-NRXN3 $\beta$ , HSE-Fc vs Fc    | 0.983              |

### Supplementary Fig. 6e

Binding activity (Fc signal/ FLAG signal)

Tukey-Kramer HSD test (two-sided)

|                                | p-Value (Prob> t ) |
|--------------------------------|--------------------|
| 0.15 $\mu$ M, WT vs HSE/AAA    | 0.977              |
| 0.15 $\mu$ M, WT vs MF/IS      | <.0001             |
| 0.15 $\mu$ M, WT vs MF/AA      | <.0001             |
| 0.15 $\mu$ M, WT vs DEN/AAA    | <.0001             |
| 0.15 $\mu$ M, WT vs Fc         | <.0001             |
| 0.15 $\mu$ M, MF/IS vs MF/AA   | 0.0087             |
| 0.15 $\mu$ M, MF/IS vs DEN/AAA | <.0001             |
| 0.15 $\mu$ M, MF/IS vs Fc      | <.0001             |
| 0.15 $\mu$ M, MF/AA vs DEN/AAA | 0.0235             |
| 0.15 $\mu$ M, MF/AA vs Fc      | 0.0314             |

**Supplementary Fig. 7d and 7g**

NLGN3 protein levels

t-test (two-sided)

|           | p-Value (Prob> t ) |
|-----------|--------------------|
| wt vs hse | 0.465              |
| wt vs mf  | 0.926              |

**Supplementary Fig. 7h and 7i**

Staining signal intensity

t-test (two-sided)

|                                         | p-Value (Prob> t ) |
|-----------------------------------------|--------------------|
| Shank2 signal, wt vs hse                | 0.315              |
| Gephyrin signal, wt vs hse              | 0.171              |
| Gephyrin/Shank2 signal ratio, wt vs hse | 0.719              |
| Shank2 signal, wt vs mf                 | 0.133              |
| Gephyrin signal, wt vs mf               | 0.596              |
| Gephyrin/Shank2 signal ratio, wt vs mf  | 0.137              |

**Supplementary Fig. 7j and 7k**

VGAT/VGlut1 Ratio

Wilcoxon (Mann-U (Rank Sums))

|                                     | p-value (Prob> Z ) |
|-------------------------------------|--------------------|
| Somatosensory Cortex, wt vs hse     | 0.0606             |
| medial Prefrontal Cortex, wt vs hse | 0.286              |
| Somatosensory Cortex, wt vs mf      | 0.0074             |
| medial Prefrontal Cortex, wt vs mf  | 0.0009             |

**Supplementary Fig. 8a and 8d**

Total distance traveled (m)

t-test (two-sided)

|           | p-Value (Prob> t ) |
|-----------|--------------------|
| wt vs hse | 0.607              |
| wt vs mf  | 0.206              |

**Supplementary Fig. 8b**

Distance traveled in chamber (m)

Bonferroni test (two-sided)

|                        | p-value  |
|------------------------|----------|
| wt, Empty vs Center    | 3.94E-06 |
| wt, Empty vs Stranger  | 0.0671   |
| wt, Center vs Empty    | 2.33E-09 |
| hse, Empty vs Center   | 1.91E-05 |
| hse, Empty vs Stranger | 9.06E-06 |
| hse, Center vs Empty   | 8.06E-12 |

t-test (two-sided)

|               | p-value |
|---------------|---------|
| Empty chamber | 0.0132  |

|                  |         |
|------------------|---------|
| Center chamber   | 0.113   |
| Stranger chamber | 0.00919 |

### Supplementary Fig. 8c

Number of entry around cage

t-test (two-sided)

|                        | p-value  |
|------------------------|----------|
| wt, Empty vs Stranger  | 0.0172   |
| hse, Empty vs Stranger | 0.000145 |

### Supplementary Fig. 8e

Distance traveled in chamber (m)

Bonferroni test (two-sided)

|                       | p-value  |
|-----------------------|----------|
| wt, Empty vs Center   | 0.0015   |
| wt, Empty vs Stranger | 0.338    |
| wt, Center vs Empty   | 1.18E-05 |
| mf, Empty vs Center   | 1.29E-04 |
| mf, Empty vs Stranger | 1        |
| mf, Center vs Empty   | 9.48E-04 |

t-test (two-sided)

|                  | p-value |
|------------------|---------|
| Empty chamber    | 0.105   |
| Center chamber   | 0.463   |
| Stranger chamber | 0.844   |

### Supplementary Fig. 8f

Number of entry around cage

t-test (two-sided)

|                       | p-value |
|-----------------------|---------|
| wt, Empty vs Stranger | 0.18    |
| mf, Empty vs Stranger | 0.495   |

### Supplementary Fig. 8g

Cage sniffing during 3-chamber social test, wt vs hse

Student's t-test (two-sided)

|                                         | p-value (Prob> t ) |
|-----------------------------------------|--------------------|
| Number of empty cage sniffing           | 0.0314             |
| Number of stranger cage sniffing        | 0.0717             |
| Mean duration of empty cage sniffing    | 0.965              |
| Mean duration of stranger cage sniffing | 0.5                |
| Total duration of empty sniffing        | 0.0836             |
| Total duration of stranger sniffing     | 0.0772             |

### Supplementary Fig. 8h

Cage sniffing during 3-chamber social test, wt vs mf

Student's t-test (two-sided)

|                                         | p-value (Prob> t ) |
|-----------------------------------------|--------------------|
| Number of empty cage sniffing           | 0.101              |
| Number of stranger cage sniffing        | 0.743              |
| Mean duration of empty cage sniffing    | 0.106              |
| Mean duration of stranger cage sniffing | 0.0104             |
| Total duration of empty sniffing        | 0.84               |
| Total duration of stranger sniffing     | 0.0745             |
